# Supplementary material for: The post-translational modification of the Clostridium difficile flagellin affects motility, cell surface properties and virulence
Source: PubMed Central journal article supplement (PMC4441256; doi:10.1111/mmi.12755), 2014-09-15
Supplement: mmi0094-0272-sd1.pdf [file mmi0094-0272-sd1.pdf]

**Supplementary Table.** List of primers

| Primer name                       | Sequence (5'-3')                                                | Function (restriction site)                   |
|-----------------------------------|-----------------------------------------------------------------|-----------------------------------------------|
| 630 CD0241CT screen F             | CAAGAAATACTTCCTGAGATTTCTAAGTG                                   | PCR screen CD0241 mutant                      |
| 630 CD0241CT screen R             | CCAATTCCAATATCAGCATTCTCTATCAT                                   | PCR screen CD0241 mutant                      |
| 630 CD0242CT screen F             | CAATTGTTGTAAACTGTGCAGGTAGAGGA                                   | PCR screen CD0242 mutants                     |
| 630 CD0242CT screen R             | ATCACCATCTAGTGATATAACAGTGTCTC                                   | PCR screen CD0242 mutants                     |
| 630 CD0243CT screen F             | ATATTCCAGAGAATCCCTATATTTTCAGT                                   | PCR screen CD0243 mutants                     |
| 630 CD0243CT screen R             | TTTCTTCATATTCTTCTATAGTTCTATATAACA                               | PCR screen CD0243 mutants                     |
| 630 CD0244CT screen F             | GATGAGCAGTGCGACTGTTATGTAGTT                                     | PCR screen CD0244 mutant                      |
| 630 CD0244CT screen R             | TCAATTTTCATCAATGACACCATCTTTG                                    | PCR screen CD0244 mutant                      |
| 630 $\Delta$ <i>fliC</i> screen F | AGTAGTCAATGTAGTCGAAGAT                                          | PCR screen $\Delta$ <i>fliC</i> mutants       |
| 630 $\Delta$ <i>fliC</i> screen R | GAATTTGGAATCTCTCTATAATAG                                        | PCR screen $\Delta$ <i>fliC</i> mutants       |
| M13F                              | ACTGGCCGTCGTTTTACA                                              | PCR screen                                    |
| M13R                              | CAGGAAACAGCTATGACC                                              | PCR screen                                    |
| 630 <i>fliC</i> comp F            | ACTTAGCCTGAATTCAGTTATAGATTAAGTTGTCCG                            | Amplify 630 <i>fliC</i> plus promoter (EcoRI) |
| 630 <i>fliC</i> comp R            | AGTACGGATGGATCCCTAAGTTCACTCTCTATTGA                             | Amplify 630 <i>fliC</i> plus promoter (BamHI) |
| 630 CD0241 comp F                 | TGTGTAATTTTTAAGGAGGTGTGTTACATATGGAAAATTATAA<br>ATTTGTTTTTGA     | Amplify CD0241 (NdeI)                         |
| 630 CD0241 comp R                 | TAGAGGATCCCCGGGTACCGAGCTCGAATTCCTTACAACAATTG<br>TTTTAGTAGTTGGCA | Amplify CD0241 (EcoRI)                        |
| 630 CD0242 comp F                 | TGTGTAATTTTTAAGGAGGTGTGTTACATATGCCAACTACTAAA<br>ACAATT          | Amplify CD0242 (NdeI)                         |
| 630 CD0242 comp R                 | GAGGATCCCCGGGTACCGAGCTCGAATTCCTTATTTTTTGTTCCT<br>ATACCATT       | Amplify CD0242 (EcoRI)                        |
| 630 CD0244 comp F1                | GTGTGTTACATATGAATCTGATGAACTATAATAA                              | Amplify CD0244 (NdeI)                         |

|                    |                                                 |                                                         |
|--------------------|-------------------------------------------------|---------------------------------------------------------|
| 630 CD0244 comp R1 | GAAAATCATTACCTTCATAAGTATATATCTGAGT              | Amplify CD0244 (SOE primer to remove NdeI)              |
| 630 CD0244 comp F2 | ACTCAGATATATACTTATGAAGGTAATGATTTTC              | Amplify CD0244 (SOE primer to remove NdeI)              |
| 630 CD0244 comp R2 | ATAATATAAGA <u>AATTC</u> CCTAAATATGGTTATTTAAAAC | Amplify CD0244 (EcoRI)                                  |
| MLVA primer set    | (Marsh <i>et al.</i> , 2006)                    | Screening for 630 $\Delta$ <i>erm</i> in mice           |
| GRD/P/103F         | GTACCTGAAACATTAGTTCCATAACTTGCTCC                | 630 $\Delta$ <i>erm</i> - <i>fliC</i> screening in mice |
| GRD/P/104F         | GTATATTTATACTTAGGAAAGGCTAAGAAGTGTG              | 630 $\Delta$ <i>erm</i> -0240screening in mice          |
| GRD/P/105F         | CAAGAAATACTTCCTGAGATTTCTAAGTG                   | 630 $\Delta$ <i>erm</i> -0241::CT screening in mice     |
| GRD/P/107F         | ATATTCCAGAGAATCCCTATATTTTCAGT                   | 630 $\Delta$ <i>erm</i> -0243::CT screening in mice     |
| EBS                | CGAAATTAGAACTTGCGTTCAGTAAAC                     | Screening in mice                                       |

CT = clostron; bp = base pairs; F = Forward; R = Reverse. Underlined sequences correspond to recognition sequences for restriction endonucleases
